# Supplementary material for: First-principles study of the mechanical and thermodynamic properties of aluminium-doped magnesium alloys
Source: Royal Society of Chemistry journal article supplement (doi:10.1039/d4ra00470a), 2024-01-01
Supplement: d4ra00470a1.pdf [file d4ra00470a1.pdf]

## Supplementary Information

### **First principles study on the mechanical and thermodynamic properties of aluminium doped magnesium alloys**

Wenjie Zhu<sup>a</sup>, Xingtao Ma<sup>a</sup>, Yarui Wang<sup>a,\*</sup>, Chaoyong Wang<sup>a</sup>, Wei Li<sup>a,b</sup>

<sup>a</sup> School of mathematics and physics, Henan University of Urban Construction, Pingdingshan 467041, China

<sup>b</sup> Henan Engineering Research Centre of Building-Photovoltaics, Pingdingshan 467036, China

\* Corresponding author:

Yarui Wang

School of mathematics and physics, Henan University of Urban Construction, Pingdingshan 467041, China

E-mail address: 20212029@huuc.edu.cn

The mechanical stability criteria of *hcp* Mg, *fcc* Al and  $Mg_xAl_y$  alloys are listed below.

**Hexagonal phase ( $C_{11}$ ,  $C_{33}$ ,  $C_{44}$ ,  $C_{12}$  and  $C_{13}$ )**

$$C_{44} > 0, C_{11} > |C_{12}|, (C_{11} + 2C_{12})C_{33} > 2C_{13}^2$$

**Cubic phase( $C_{11}$ ,  $C_{44}$  and  $C_{12}$ )**

$$C_{11} > 0, C_{44} > 0, C_{11} > |C_{12}|, (C_{11} + 2C_{12}) > 0$$

The formulas of elastic moduli of *hcp* Mg, *fcc* Al and  $Mg_xAl_y$  alloys are listed below.

**Hexagonal phase ( $C_{11}$ ,  $C_{33}$ ,  $C_{44}$ ,  $C_{12}$  and  $C_{13}$ )**

$$B_V = (1/9)[2(C_{11} + C_{12}) + 4C_{13} + C_{33}]$$

$$G_V = (1/30)(M + 12C_{44} + 12C_{66})$$

$$B_R = C^2/M$$

$$G_R = (5/2)[C^2C_{44}C_{66}]/[3B_VC_{44}C_{66} + C^2(C_{44} + C_{66})]$$

$$M = C_{11} + C_{12} + 2C_{33} - 4C_{13}$$

$$C^2 = (C_{11} + C_{12})C_{33} - 2C_{13}^2$$

**Cubic phase( $C_{11}$ ,  $C_{44}$  and  $C_{12}$ )**

$$B_V = B_R = (C_{11} + 2C_{12})/3$$

$$G_V = (C_{11} - C_{12} + 3C_{44})/5$$

$$G_R = 5(C_{11} - C_{12})C_{44}/[4C_{44} + 3(C_{11} - C_{12})]$$

It is worth noting that the structures listed in Tables S1, S2 and S3 are the metastable  $Mg_xAl_y$ , except for  $Mg_{11}Al_5$ ,  $Mg_5Al_3$  and  $Mg_9Al_7$ . Listing the data of these structures in Supplementary Information was just for reference purposes if necessary.  $Mg_{11}Al_5$ ,  $Mg_5Al_3$  and  $Mg_9Al_7$  are the most stable structures determined based on the formation energies and convex hull diagram, and their elastic properties, electronic properties and thermodynamic properties were discussed in the main text.

**Table S1. The elastic constants (Gpa) of Mg<sub>x</sub>Al<sub>y</sub> structures.**

| <b>Structure</b>                     | <b><math>C_{11}</math></b> | <b><math>C_{12}</math></b> | <b><math>C_{13}</math></b> | <b><math>C_{33}</math></b> | <b><math>C_{44}</math></b> |
|--------------------------------------|----------------------------|----------------------------|----------------------------|----------------------------|----------------------------|
| <b>Mg<sub>15</sub>Al<sub>1</sub></b> | <b>64.6</b>                | <b>24.3</b>                | <b>22.8</b>                | <b>71.8</b>                | <b>18.7</b>                |
| <b>Mg<sub>7</sub>Al</b>              | <b>66.9</b>                | <b>29.1</b>                | <b>24.6</b>                | <b>73.4</b>                | <b>21.1</b>                |
| <b>Mg<sub>13</sub>Al<sub>3</sub></b> | <b>62.6</b>                | <b>32.2</b>                | <b>25.0</b>                | <b>66.2</b>                | <b>15.1</b>                |
| <b>Mg<sub>3</sub>Al</b>              | <b>69.6</b>                | <b>31.7</b>                | <b>30.5</b>                | <b>84.7</b>                | <b>14.5</b>                |
| <b>MgAl</b>                          | <b>74.3</b>                | <b>43.9</b>                | <b>35.7</b>                | <b>89.9</b>                | <b>20.6</b>                |
| <b>Mg<sub>7</sub>Al<sub>9</sub></b>  | <b>71.8</b>                | <b>54.4</b>                | <b>40.1</b>                | <b>91.2</b>                | <b>23.1</b>                |
| <b>Mg<sub>3</sub>Al<sub>5</sub></b>  | <b>71.9</b>                | <b>42.7</b>                | <b>39.1</b>                | <b>100.8</b>               | <b>19.3</b>                |
| <b>Mg<sub>5</sub>Al<sub>11</sub></b> | <b>75.0</b>                | <b>44.7</b>                | <b>38.0</b>                | <b>108.2</b>               | <b>21.1</b>                |
| <b>MgAl<sub>3</sub></b>              | <b>81.4</b>                | <b>45.4</b>                | <b>43.5</b>                | <b>114.1</b>               | <b>19.9</b>                |
| <b>Mg<sub>3</sub>Al<sub>13</sub></b> | <b>67.3</b>                | <b>47.5</b>                | <b>54.2</b>                | <b>104.0</b>               | <b>23.4</b>                |
| <b>MgAl<sub>7</sub></b>              | <b>75.2</b>                | <b>49.9</b>                | <b>50.7</b>                | <b>112.9</b>               | <b>17.8</b>                |
| <b>MgAl<sub>15</sub></b>             | <b>82.2</b>                | <b>48.3</b>                | <b>58.3</b>                | <b>106.1</b>               | <b>17.2</b>                |

**Table S2.** The elastic moduli with the unit of GPa ( $B_R$  and  $B_V$  represent the bulk moduli with the Reuss and Voigt averaging scheme, respectively;  $G_R$  and  $G_V$  represent the shear moduli with the Reuss and Voigt averaging scheme, respectively;  $E$ ,  $B$  and  $G$  represent Young's modulus, bulk modulus and shear modulus with the Voigt-Reuss-Hill averaging scheme, respectively), Poisson's ratio ( $\nu$ ), anisotropy ( $A^U$ ) and hardness ( $H_v$ ) of  $Mg_xAl_y$ .

| Structure     | $B_R$ | $B_V$ | $G_R$ | $G_V$ | $E$  | $B$  | $G$  | $\nu$ | $B/G$ | $A^U$ | $H_v$ |
|---------------|-------|-------|-------|-------|------|------|------|-------|-------|-------|-------|
| $Mg_{15}Al_1$ | 37.82 | 37.87 | 20.10 | 20.25 | 51.4 | 37.8 | 20.2 | 0.27  | 1.88  | 0.04  | 3.8   |
| $Mg_7Al$      | 40.42 | 40.42 | 20.65 | 20.81 | 53.1 | 40.4 | 20.7 | 0.28  | 1.95  | 0.04  | 3.7   |
| $Mg_{13}Al_3$ | 39.51 | 39.53 | 16.07 | 16.36 | 42.8 | 39.5 | 16.2 | 0.32  | 2.44  | 0.09  | 2.4   |
| $Mg_3Al$      | 45.19 | 45.48 | 17.60 | 18.34 | 47.6 | 45.3 | 18.0 | 0.32  | 2.52  | 0.22  | 2.5   |
| $MgAl$        | 52.04 | 52.12 | 18.70 | 19.49 | 51.1 | 52.1 | 19.1 | 0.34  | 2.73  | 0.21  | 2.4   |
| $Mg_7Al_9$    | 55.96 | 56.00 | 14.01 | 17.66 | 43.4 | 56.0 | 15.8 | 0.37  | 3.54  | 1.30  | 1.5   |
| $Mg_3Al_5$    | 53.15 | 54.04 | 17.93 | 18.89 | 49.6 | 53.6 | 18.4 | 0.35  | 2.91  | 0.28  | 2.1   |
| $Mg_5Al_{11}$ | 54.66 | 55.51 | 19.24 | 20.64 | 53.4 | 55.1 | 19.9 | 0.34  | 2.76  | 0.38  | 2.4   |
| $MgAl_3$      | 59.02 | 60.19 | 20.37 | 21.19 | 55.9 | 59.6 | 20.8 | 0.34  | 2.87  | 0.22  | 2.4   |
| $Mg_3Al_{13}$ | 57.21 | 61.16 | 14.37 | 16.85 | 43.1 | 59.2 | 15.6 | 0.38  | 3.79  | 0.93  | 1.4   |
| $MgAl_7$      | 60.65 | 62.88 | 16.00 | 17.12 | 45.6 | 61.8 | 16.6 | 0.38  | 3.73  | 0.39  | 1.5   |
| $MgAl_{15}$   | 64.37 | 66.70 | 17.18 | 17.31 | 47.6 | 65.5 | 17.2 | 0.38  | 3.80  | 0.07  | 1.5   |

**Table S3. Theoretically calculated thermal properties of  $\text{Mg}_x\text{Al}_y$  alloys including longitudinal sound velocity ( $v_l$ ), shear sound velocity ( $v_t$ ) and average sound velocity ( $v_m$ ) and Debye temperature ( $\Theta_D$ ).**

| Structure                   | $v_l(\text{m}\cdot\text{s}^{-1})$ | $v_t(\text{m}\cdot\text{s}^{-1})$ | $v_m(\text{m}\cdot\text{s}^{-1})$ | $\Theta_D$ (K) |
|-----------------------------|-----------------------------------|-----------------------------------|-----------------------------------|----------------|
| $\text{Mg}_{15}\text{Al}$   | 6011.21                           | 3355.94                           | 3736.24                           | 394.39         |
| $\text{Mg}_7\text{Al}$      | 6077.94                           | 3354.36                           | 3737.87                           | 397.21         |
| $\text{Mg}_{13}\text{Al}_3$ | 5692.69                           | 2931.37                           | 3282.52                           | 350.69         |
| $\text{Mg}_3\text{Al}$      | 5928.49                           | 3019.14                           | 3383.16                           | 365.86         |
| $\text{MgAl}$               | 5945.14                           | 2950.51                           | 3311.36                           | 367.42         |
| $\text{Mg}_7\text{Al}_9$    | 5844.30                           | 2648.40                           | 2986.05                           | 333.64         |
| $\text{Mg}_3\text{Al}_5$    | 5839.48                           | 2834.30                           | 3184.89                           | 356.82         |
| $\text{Mg}_5\text{Al}_{11}$ | 5907.32                           | 2918.80                           | 3276.60                           | 368.79         |
| $\text{MgAl}_3$             | 6031.89                           | 2942.58                           | 3305.65                           | 374.28         |
| $\text{Mg}_3\text{Al}_{13}$ | 5705.09                           | 2520.21                           | 2844.63                           | 323.88         |
| $\text{MgAl}_7$             | 5773.07                           | 2565.58                           | 2895.11                           | 331.43         |
| $\text{MgAl}_{15}$          | 5852.68                           | 2582.92                           | 2915.52                           | 335.97         |
